# Supplementary material
Source: HighWire-hosted journal article supplement (https://cmaj.ca/highwire/filestream/72375/field_highwire_adjunct_files/0/181067-res-1-at.pdf)
Supplement: 181067-res-1-at.pdf [file 181067-res-1-at.pdf]

## Appendix 1 (as supplied by the authors)

**EPIMOMS multicriteria standardised definition of severe maternal morbidity, that was developed through a national Delphi formal expert consensus process, concerning only women during their pregnancy after 22 gestational weeks and until the 42<sup>nd</sup> day after their delivery**

| ITEMS                                      | CRITERIA (AT LEAST ONE)                                                                                                                                                                                                                                         |
|--------------------------------------------|-----------------------------------------------------------------------------------------------------------------------------------------------------------------------------------------------------------------------------------------------------------------|
|                                            | . Volume of postpartum blood loss $\geq$ 1500 ml                                                                                                                                                                                                                |
|                                            | . Blood transfusion $\geq$ 4 units RBC                                                                                                                                                                                                                          |
| <b>Major obstetric hemorrhage</b>          | . Uterine arteries embolisation                                                                                                                                                                                                                                 |
|                                            | . Vascular ligation, compressive uterine sutures                                                                                                                                                                                                                |
|                                            | . Emergency peripartum hysterectomy                                                                                                                                                                                                                             |
| <b>Eclampsia</b>                           | Seizures in a woman diagnosed with preeclampsia, and if not, not attributable to another cause                                                                                                                                                                  |
| <b>HELLP syndrome</b>                      | HELLP syndrome* <u>only if</u> associated with hepatic haematoma or rupture<br>*Haemolysis, Elevated Liver enzymes > 3 times the normal level and Low platelets < 50 000                                                                                        |
| <b>Severe preeclampsia</b>                 | Preeclampsia** only if it induced a preterm delivery for a main maternal indication before 32 gestational weeks<br>** Defined as hypertension $\geq$ 140/90 and proteinuria $\geq$ 0.3 g/24 h                                                                   |
| <b>Pulmonary embolism</b>                  | Clinical symptoms consistent with pulmonary embolism + confirmation with imaging + treatment<br>(imaging: computed tomography or ventilation/perfusion scintigraphy or Doppler; treatment: heparin or thrombolysis or embolectomy)                              |
| <b>Placental abruption</b>                 | Placental abruption associated with a haematological dysfunction criterion                                                                                                                                                                                      |
| <b>Stroke</b>                              | Cerebral imaging showing cerebral infarction or haemorrhage, or venous thrombosis, or sub-arachnoid haemorrhage                                                                                                                                                 |
| <b>Cerebral transient ischaemic attack</b> | Neurological deficit with symptoms§ completely regressive in 24 hours and normal cerebral imaging, in absence of associated migraine confirmed by neurologist<br>§ Monocular blindness, aphasia, haemianopsia, motor and/or sensory uni- or bilateral disorders |
| <b>Severe psychiatric disorder</b>         | . Severe acute psychiatric disorder or acute decompensation of chronic disease (psychosis, major depression, bipolar disorder) diagnosed by psychiatrist<br>. Suicide attempt                                                                                   |

|                                                          |                                                                                                                                                                                                                                                                                                                                        |
|----------------------------------------------------------|----------------------------------------------------------------------------------------------------------------------------------------------------------------------------------------------------------------------------------------------------------------------------------------------------------------------------------------|
|                                                          | <ul style="list-style-type: none"> <li>. Cardiac arrest</li> <li>. Acute pulmonary oedema with hypoxaemia &lt; 60 mm Hg or SaO<sub>2</sub> &lt; 90% or treated with diuretics</li> <li>. Shock: Systolic blood pressure &lt; 90 mm Hg during &gt; 60 min or unresponsive to plasma expansion</li> </ul>                                |
| <b>Cardiovascular dysfunction</b>                        | <ul style="list-style-type: none"> <li>. Acute left ventricular dysfunction: left ventricular ejection fraction &lt; 40%</li> <li>. Need for continuous IV vasopressor/inotrope drugs</li> <li>. Decompensation of a pre-existing cardiopathy with need for specialised management</li> <li>. Troponinaemia &gt; 1 microg/l</li> </ul> |
| <b>Respiratory dysfunction</b>                           | <ul style="list-style-type: none"> <li>. Acute hypoxaemia &lt; 60 mm Hg or SaO<sub>2</sub> &lt; 90% with spontaneous ventilation</li> <li>. Mechanical ventilation, or non-invasive ventilation in the absence of chronic disease, not related to anaesthesia</li> </ul>                                                               |
| <b>Renal dysfunction</b>                                 | <ul style="list-style-type: none"> <li>. Acute renal failure with creatinemia &gt; 135 µmol/l</li> <li>. Acute oliguria &lt; 500 ml/24 h</li> </ul>                                                                                                                                                                                    |
| <b>Neurological dysfunction</b>                          | <p>Coma, regardless of stage and duration #</p> <p># Stage 1 coma = impaired consciousness with obtundation and reaction to painful stimuli only</p>                                                                                                                                                                                   |
| <b>Hepatic dysfunction</b>                               | <ul style="list-style-type: none"> <li>. Prothrombin time &lt; 60%, in the absence of constitutional deficiency</li> <li>. Direct bilirubinaemia &gt; 20 micromole/l</li> </ul>                                                                                                                                                        |
| <b>Haematological dysfunction</b>                        | <ul style="list-style-type: none"> <li>. Thrombocytopenia &lt; 50 000 /mm<sup>3</sup> in the absence of chronic disorder</li> <li>. Acute anemia &lt; 7 g/dl</li> <li>. Disseminated intravascular coagulation: platelets &lt; 50 000/ mm<sup>3</sup> or prothrombin time &lt; 60% or fibrinogen &lt; 2 g/l</li> </ul>                 |
| <b>Emergency surgery apart from childbirth procedure</b> | <ul style="list-style-type: none"> <li>. Secondary hysterectomy</li> <li>. Laparotomy for post-delivery complication apart from haematoma or parietal infection</li> </ul>                                                                                                                                                             |
| <b>Admission to Intensive Care Unit</b>                  |                                                                                                                                                                                                                                                                                                                                        |
| <b>Maternal death</b>                                    |                                                                                                                                                                                                                                                                                                                                        |
